# Supplementary material for: Wave Properties of Gas-Hydrate Bearing Sediments Based on Poroelasticity
Source: Frontiers journal article supplement (doi:10.3389/feart.2021.640424), 2021-04-29
Supplement: Data_Sheet_1.docx [file Data_Sheet_1.docx]

**APPENDIX A**

The modified Hashin-Shtrikman dry-rock moduli are (Dvorkin et al., 1999; Ecker et al., 2000)

, (A1a)

, (A1b)

, (A2a)

, (A2b)

and

, (A3)

where is the porosity, is the critical porosity, in the range 0.36~0.4, and and are the dry-rock bulk and shear moduli at the critical porosity, respectively,

, (A4)

where is the average number of contacts per grain, is the Poisson ratio of the mineral mixture and is the effective pressure.

, (A5)

where and are the densities of the solid and fluid phases, respectively, is the gravity constant and is depth below seafloor.

**APPENDIX B**

**Biot-Rayleigh double-porosity theory**

The Biot-Rayleigh double-porosity theory proposed by Ba et al. (2011) is based on the Biot theory and Hamilton principle. The same equations are applied to the two models, but the definitions of some basic variables are different.

(B1)

(B2)

(B3)

(B4)

where is the average particle displacement of the solids. , , are the corresponding three divergence fields. is the fluid strain increment caused by the local flow process. In Model 1, , are the displacement of fluid phase 1 (formation water), and fluid phase 2 (gas hydrate/free gas). In Model 2, and are the displacements of fluid phase 1 (fluid in the host skeleton), and fluid phase 2 (fluid in the inclusions of hydrate), respectively.

**APPENDIX C**

**Model 1 equations**

The five density coefficients in Model 1 are

, (C1a)

, (C1b)

, (C1c)

, (C1d)

, (C1e)

, (C1f)

The dissipation coefficients of the two types of pores are

. (C2)

The stiffness coefficients in Model 1 are

, (C3a)

, (C3b)

, (C3c)

, (C3d)

, (C3f)

. (C3g)

**Model 2 equations**

The five density coefficients in Model 2 are

, (C4a)

, (C4b)

, (C4c)

, (C4d)

. (C4f)

The stiffness coefficients are

, (C5a)

, (C5b)

, (C5c)

, (C5d)

, (C5e)

, (C5f)

. (C5g)

where , are the displacement divergence fields of two fluid phases.
